RESEARCH ARTICLE

# Associations of Bone Mineral Density with Lean Mass, Fat Mass, and Dietary Patterns in Postmenopausal Chinese Women: A 2-Year Prospective Study

Yongjie Chen<sup>1</sup>, Jing Xiang<sup>1</sup>, Zhiqiang Wang<sup>2</sup>, Yaming Xiao<sup>1</sup>, Dongmei Zhang<sup>3</sup>, Xia Chen<sup>4</sup>, Huiting Li<sup>5</sup>, Meina Liu<sup>1</sup>\*, Qiuju Zhang<sup>1</sup>\*

**1** Department of Biostatistics, Public Health College, Harbin Medical University, Harbin City, Heilongjiang Province, China, **2** School of Medicine, University of Queensland, Royal Brisbane & Women's Hospital, Brisbane, Queensland, Australia, **3** The First People's Hospital of Tengzhou, Zaozhuang City, Shandong Province, China, **4** Department of Epidemiology and Evidence-based Medicine, Public Health College, Changsha Medical University, Changsha City, Hunan Province, China, **5** The Harbin Institute of Technology Hospital, Harbin City, Heilongjiang Province, China

\* These authors contributed equally to this work.

\* [liumeina369@163.com](mailto:liumeina369@163.com) (ML); [zqj81129@sina.com](mailto:zqj81129@sina.com) (QJZ)

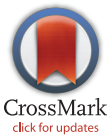

**OPEN ACCESS**

**Citation:** Chen Y, Xiang J, Wang Z, Xiao Y, Zhang D, Chen X, et al. (2015) Associations of Bone Mineral Density with Lean Mass, Fat Mass, and Dietary Patterns in Postmenopausal Chinese Women: A 2-Year Prospective Study. PLoS ONE 10(9): e0137097. doi:10.1371/journal.pone.0137097

**Editor:** Stephen L. Clarke, Oklahoma State University, UNITED STATES

**Received:** March 20, 2015

**Accepted:** August 12, 2015

**Published:** September 3, 2015

**Copyright:** © 2015 Chen et al. This is an open access article distributed under the terms of the [Creative Commons Attribution License](https://creativecommons.org/licenses/by/4.0/), which permits unrestricted use, distribution, and reproduction in any medium, provided the original author and source are credited.

**Data Availability Statement:** All data files are available from the Dryad database (doi:[10.5061/dryad.t8t0d](https://doi.org/10.5061/dryad.t8t0d)).

**Funding:** This study was supported by the National Major Scientific and Technological Special Project of China (2014ZX08011005). The funders had no role in study design, data collection and analysis, decision to publish, or preparation of the manuscript. <http://www.nmp.gov.cn/>

**Competing Interests:** The authors have declared that no competing interests exist.

## Abstract

### Objective

To assess factors associated with bone mineral density (BMD) in postmenopausal women in a longitudinal study, and to examine the relative contribution of lean mass, fat mass, dietary patterns, and years since menopause to BMD.

### Methods

Two hundred and eighty-two postmenopausal women were randomly selected from Hongqi Community Health Center, in Harbin City, China. All participants were followed up from 2009 to 2011. Dietary data were collected using a Food Frequency Questionnaire. BMD of the left hip, the lumbar spine, and the total body, and the body composition were measured by dual-energy X-ray absorptiometry at baseline and follow-up.

### Results

Lean mass and fat mass were positively associated with BMD of the spine, hip, and the total body at both baseline and follow-up. The association between fat mass and BMD at the spine at baseline ( $P = 0.210$ ) and at the spine ( $P = 0.116$ ) and hip ( $P = 0.073$ ) in the second year was not statistically significant when height was adjusted. Six dietary patterns were identified but only cereal grains-fruits pattern ( $P = 0.001$  in the spine,  $P = 0.037$  in hip) and milk-root vegetables pattern ( $P = 0.010$  in hip) were associated with BMD of the spine and hip. The linear mixed model of follow-up data showed that lean mass, years since

menopause, and age of menopause were the significant determinants of BMD of all sites. Moreover, lean mass was the best determinant of BMD (VIP = 1.936).

## Conclusion

Lean mass, years since menopause, age of menopause and dietary patterns are the important determinants of BMD of the spine, hip, and the total body. Lean mass is the best determinant of BMD.

## Introduction

Osteoporosis is a major public health problem all over the world for its high morbidity among the aging populations especially for women[1]. Osteoporotic fracture is the most serious outcome of osteoporosis and commonly results in permanent disability, admission to institutional care, and even death[2–5]. Low bone mineral density (BMD) is one of the main pathogenic factors of osteoporotic fracture[6, 7]. BMD has been widely accepted as a surrogate measure for the diagnosis of osteopenia and osteoporosis[8, 9]. Therefore, improved understanding of the primary predictors of BMD would have important implications for public health and preventive medicine.

A large number of cross-sectional studies have found a significant relationship between BMD and age, body weight, and body composition in postmenopausal women [10–13]. Numerous other physiologic, health, and lifestyle factors, such as years since menopause, history of fracture, smoking status, alcohol consumption, blood pressure, dietary calcium intake, estrogen replacement therapy, use of steroid drugs, muscle strength, past and current physical activity level, dependence on assistance for instrumental activities of daily living (IADL), gait and balance impairment, and social (educational attainment and family income) and psychophysical health status are also associated with BMD in the postmenopausal women[5, 14–17]. However, it has been shown that longitudinal studies can provide a better understanding of the contribution of these factors to BMD[6, 18, 19]. Because only a few prospective studies investigating the influencing factors associated with bone loss over a long-term of postmenopausal life have been reported, limited information is available on whether body weight, body composition, and other physiologic, health, and lifestyle factors have a direct effect on the rate of BMD change in elderly women. Furthermore, none of the previous studies have taken a full consideration of dietary pattern of participants. Different dietary patterns have different characteristics of nutrient intake, such as calcium element, vitamin D, and dietary fiber (DF). These nutrients considerably affect the concentration and absorption of calcium element in body. On the other hand, although Ho-Pham[20], Chen Z[21], and Gnudi S[22] reported the relative contribution of lean mass and fat mass to BMD, this relative contribution has been highly contentious. A meta-analysis by Ho-Pham reported that the correlation between lean mass and BMD was significantly higher than the correlation between fat mass and BMD in women[23]. Although the effects of lean mass and fat mass on BMD were comparable in postmenopausal women, the correlation for lean mass was still greater than correlation for fat mass. So far, however, the relative importance of other physiologic, health, and lifestyle factors to BMD is still unknown. Similar studies in Chinese population[1, 24, 25] were of only cross-sectional designs. In this paper, a 2-year prospective study was designed to investigate the relative contribution of the primary factors, including dietary patterns, years since menopause and other physiologic factors, in addition to body composition, to BMD in Chinese women.

Considering the effect of other primary factors simultaneously, we hypothesized that lean mass was the key determinant of BMD, and dietary patterns was also an important predictor of BMD. Therefore, the aims of this study were: (i) to identify the dynamic predictors of BMD over a 2-year period; (ii) to assess the relative contribution of lean mass, fat mass, dietary patterns, and years since menopause to BMD over the follow-up period in postmenopausal Chinese women.

## Methods

### Subjects and Follow-Up

In Harbin City, China, Hongqi Community Health Center was randomly selected as the target community from all teaching community hospitals of Harbin Medical University. In this community, 373 volunteers were randomly recruited and those who met the following inclusion criteria were included in the study. According to a previous study[26], the postmenopausal status was defined as menopause at least one year since the last natural menstruation. The postmenopausal women aged between 50 and 65 years at the time of the study and having lived in Harbin for at least 5 years were eligible for this study. Subjects were excluded if they: (i) had disorders of calcium metabolism or calcium absorption; (ii) had disorders of bone; (iii) had gastrointestinal disease, coronary heart disease, stroke, diabetes, cancer, thyroid or parathyroid disease, chronic liver disease or chronic kidney disease; (iv) suffered from ovarian surgery, premenopausal hysterectomy, gastric resection and thyroidectomy; (v) used estrogen at the time of the study or had taken drugs for a month or more; and (vi) were likely to migrate. Finally, 282 women were included in the study. The study protocol was approved by the National Institute of Nutrition and Food Safety Chinese Center for Disease Control and Prevention Ethical Review Committee. The individual in this manuscript has given written informed consent to publish these case details.

During the two year follow-up period, we visited subjects at baseline, and then one and two years after the baseline to collect data on demographic and socioeconomic background, body composition, bone mineral density, food frequency, blood specimens of morning fasting and urine of 24 hours. Data of food frequency were collected using the Food Frequency Questionnaire (FFQ), which was designed in case report form.

### Structured Questionnaire

The structured questionnaire included the following items: demographic and socioeconomic background, age at menopause, estrogen replacement therapy, past medical history, food frequency, past physical activity level, reproductive and menstrual history, and mental status. The validity and reliability of the questionnaire was tested. Participants were face-to-face interviewed by trained investigators using the validated questionnaire. Each subject recalled the diet of the past year with the help of estimating portion size through detailed pictorial information. The dietary nutrient intake was estimated using the 3-day food records, such as energy, protein, calcium, vitamin D, and other microelements.

Physical measurements were obtained according to standardized protocol. Height was measured without shoes to the nearest 0.1cm, and weight with only light clothing to the nearest 0.1kg. The means of three repeated measures were calculated and recorded. Body mass index (BMI) was calculated as weight (in kg) divided by height (in m) square. Waist circumference was measured at the minimum circumference between the iliac crest and the rib cage while hip circumference was measured at the maximum protuberance of the buttocks. Waist and hip circumferences were used to calculate the waist-hip-ratio (WHR).

## Body Composition and Bone Mineral Density Measurements

Baseline and follow-up BMD values of left hip (femoral neck, trochanter, Ward's triangle), lumbar spine (L2-L4), and total body, and body composition were measured by dual-energy X-ray absorptiometry (DXA, Norland Corp, USA) in Harbin Orthopedics Hospital. Body composition was represented by lean mass (bone mineral excluded) and fat mass (in kg). The long-term precision values, expressed as coefficient of variation (CV) for repeated measurements over two years, were 1.0% for total body, 1.2% for hip, and 1.0% for lumbar spine.

## Dietary Assessment and Dietary Patterns Derivation

At baseline, dietary nutrients intake was assessed using a validated FFQ developed in a population survey[27]. The FFQ consisted of 80 food items. Each subject recalled the frequency and the usual amount of consumption of each food item over the past year. For seasonally consumed vegetables and fruits, subjects were further asked about the duration of such food consumption over the past year.

To determine the dietary patterns, individual food items were first aggregated into groups. A total of thirteen separate food groups were formed based on the similarity of food types and nutrient composition. The percentage contribution to the total energy from each food group was calculated as the energy intake from that food group divided by the total energy intake and multiplying by 100. Factor analysis was conducted with varimax rotation using the thirteen food groups. Factors were retained with eigenvalues greater than 1.0, a scree plot and interpretability. Finally, six dietary patterns were identified.

## Variables Importance to BMD

To better understand the relative importance of all factors to BMD, variable importance (VIP) to BMD was produced in this study. When 1) there are only a small number of factors, 2) those factors are not significantly redundant (collinear), and 3) a well-understood relationship to the response, multiple linear regression (MLR) can be a good way to assess the predictive values of those factors. However, if any of these three conditions breaks down, MLR can be inefficient or inappropriate[28]. Given this condition, partial least square (PLS) developed in the 1960's by Herman Wold was used. PLS is widely used to construct predictive models to solve the highly collinear when the sample size was small but the variables can number in the hundreds even thousands and are likely to be highly collinear[29]. Considering the sample size and the hundreds of factors in this study, PLS was used to obtain VIP to BMD.

## Statistical Analysis

The analysis was conducted in four steps. First, dietary patterns were derived by factor analysis. Second, VIPs to BMD at all sites were estimated using PLS for factors including demographic and socioeconomic background, body composition, dietary patterns, past medical history, past physical activity level, and years since menopause. Third, the relationships between BMD and the primary variables such as lean mass, fat mass, height, and years since menopause at the baseline and follow-up were assessed. Pearson and Spearman correlation were used to analyze the association between BMD and the primary factors. Partial correlation was used to assess the strength of association adjusting for height and calcium supplementation. Finally, for follow-up data, linear mixed model was used to analyze the association between BMD and the primary variables with greater VIP to BMD. Three BMD measurements in each site were taken as dependent variables. The spine, hip and total body values were used to structure three linear mixed models, respectively. Lean mass and fat mass of three measurements were taken as time

specific independent variables. And other variables, including age, years since menopause, dietary patterns, height, weight, systolic blood pressure (SBP), WHR, change of weight since menopause, age of menopause, educational attainment, occupation, family income and physical activity level, were taken as covariates. The procedure of PROC MIXED was used to estimate the parameters of linear mixed model. Since this study was based on a randomized controlled trial, all analyses were adjusted for calcium supplementation.

Basic characteristics of subjects were reported as mean and SDs for continuous variables and numbers and percentages for categorical variables. All analyses were conducted using the programs of SAS v9.2 (SAS Institute, Inc., Cary, NC, USA). All tests were two-tailed with a 5% level as the level of significance.

## Results

### Descriptive Variables

The mean age of all subjects was 56.1 (SD = 3.8) years and the mean time since menopause was 6.7 (SD = 4.4) years. [Table 1](#) provides characteristics of all subjects at baseline and follow-up and body composition and bone measurements. During the follow-up, 212 subjects participated in the first year and 202 in the second year assessments, and the drop-out rates were 24.8% and 28.4%, respectively.

### VIP to BMD

Demographic and socioeconomic characteristics, body composition, dietary patterns, past medical history, past physical activity level, and years since menopause were analyzed using PLS to obtain the VIP to BMD. These analyses were conducted with BMD of the spine, hip, and the total body from the follow-up data as the dependent variables. The first sixteen VIPs to BMD were in the following order: lean mass, weight, years since menopause, height, age, fat mass, family income, educational attainment, dietary pattern 2 (frequent intake of rice, cooked wheaten food, fried food, and other grains and little intake of fruits), occupation, age of menopause, dietary pattern 3 (frequent intake of milk and little intake of root vegetables), physical activity level, WHR, systolic blood pressure (SBP), and change of weight since menopause.

### Contribution of Lean Mass and Fat Mass to BMD: Cross-Sectional Analyses

[Table 2](#) provides correlation coefficients among single body composition, height, and years since menopause and BMD of the spine, hip, and the total body at baseline and follow-up adjusting for calcium supplementation. The lean mass and fat mass were the significant determinants of BMD at all sites at baseline and follow-up. Moreover, the correlation coefficients of lean mass with BMD at any site were greater than those of fat mass at both baseline and follow-up. Height, as a body size measurement, was positively correlated with BMD at all sites at baseline. The variable of years since menopause was inversely associated with the baseline BMD at all sites.

[Table 3](#) shows partial correlation coefficients between the body composition and BMD of the spine, hip, and the total body adjusting for height and calcium supplementation at baseline and follow-up. Lean mass was positively correlated with BMD at all sites at both baseline and follow-up. However, the association of fat mass with BMD at the spine at baseline was not statistically significant, neither at the spine and hip in the second year.

**Table 1. The characteristics of participants at baseline and follow-up.**

| Factors                                            | Category                   | Mean/Frequency | SDs/Percent |
|----------------------------------------------------|----------------------------|----------------|-------------|
| Age (year)                                         |                            | 56.11          | 3.83        |
| Age of menopause (year)                            |                            | 15.70          | 1.88        |
| Years since menopause (year)                       |                            | 6.70           | 4.40        |
| WHR*                                               |                            | 0.85           | 0.05        |
| Height (cm)                                        |                            | 158.06         | 5.30        |
| Weight(kg)                                         |                            | 61.84          | 8.40        |
| Change of weight since menopause (kg)              |                            | 2.11           | 5.44        |
| SBP# (mmHg)                                        |                            | 128.24         | 18.72       |
| Spine <sup>1st</sup> BMD (g/cm <sup>2</sup> )      |                            | 0.90           | 0.16        |
| Spine <sup>2nd</sup> BMD (g/cm <sup>2</sup> )      |                            | 0.92           | 0.16        |
| Spine <sup>3rd</sup> BMD (g/cm <sup>2</sup> )      |                            | 0.90           | 0.15        |
| Hip <sup>1st</sup> BMD (g/cm <sup>2</sup> )        |                            | 0.55           | 0.11        |
| Hip <sup>2nd</sup> BMD (g/cm <sup>2</sup> )        |                            | 0.57           | 0.11        |
| Hip <sup>3rd</sup> BMD (g/cm <sup>2</sup> )        |                            | 0.58           | 0.12        |
| Total body <sup>1st</sup> BMD (g/cm <sup>2</sup> ) |                            | 0.91           | 0.09        |
| Total body <sup>2nd</sup> BMD (g/cm <sup>2</sup> ) |                            | 0.92           | 0.12        |
| Total body <sup>3rd</sup> BMD (g/cm <sup>2</sup> ) |                            | 0.92           | 0.08        |
| Lean mass <sup>1st</sup> (kg)                      |                            | 37.13          | 4.90        |
| Lean mass <sup>2nd</sup> (kg)                      |                            | 35.95          | 4.67        |
| Lean mass <sup>3rd</sup> (kg)                      |                            | 34.63          | 4.60        |
| Fat mass <sup>1st</sup> (kg)                       |                            | 21.90          | 4.71        |
| Fat mass <sup>2nd</sup> (kg)                       |                            | 24.08          | 5.34        |
| Fat mass <sup>3rd</sup> (kg)                       |                            | 24.28          | 5.20        |
| Educational attainment                             |                            |                |             |
|                                                    | Below junior middle school | 22             | 7.80        |
|                                                    | Junior middle school       | 125            | 44.33       |
|                                                    | Senior middle school       | 88             | 31.20       |
|                                                    | University or above        | 47             | 16.67       |
| Occupation                                         |                            |                |             |
|                                                    | Administration             | 57             | 20.21       |
|                                                    | Clerical work              | 79             | 28.01       |
|                                                    | Laborer                    | 106            | 37.59       |
|                                                    | Other                      | 40             | 14.19       |
| Family income                                      |                            |                |             |
|                                                    | < = 1000¥                  | 69             | 24.47       |
|                                                    | 1001~1500¥                 | 84             | 29.79       |
|                                                    | 1501~2000¥                 | 46             | 16.31       |
|                                                    | 2001~3000¥                 | 40             | 14.18       |
|                                                    | >3000¥                     | 43             | 15.25       |
| Physical activity level                            |                            |                |             |
|                                                    | Little                     | 53             | 18.79       |
|                                                    | Median                     | 94             | 33.33       |
|                                                    | Many                       | 74             | 26.25       |
|                                                    | More                       | 61             | 21.63       |

\* waist-hip-ratio

#systolic blood pressure.

doi:10.1371/journal.pone.0137097.t001

**Table 2. Correlation of BMD of the spine, hip, and the total body with body composition at baseline and follow-up (adjusting for calcium supplementation).**

| Parameters             | BMD      |          |          |          |            |          |
|------------------------|----------|----------|----------|----------|------------|----------|
|                        | Spine    |          | Hip      |          | Total body |          |
|                        | <i>r</i> | <i>P</i> | <i>r</i> | <i>P</i> | <i>r</i>   | <i>P</i> |
| <b>The baseline</b>    |          |          |          |          |            |          |
| Lean mass              | 0.3726   | <.0001   | 0.4527   | <.0001   | 0.4569     | <.0001   |
| Fat mass               | 0.1354   | 0.0230   | 0.2156   | 0.0003   | 0.2235     | 0.0002   |
| Height                 | 0.3181   | <.0001   | 0.3629   | <.0001   | 0.3885     | <.0001   |
| Years since menopause  | -0.3711  | <.0001   | -0.2940  | <.0001   | -0.3626    | <.0001   |
| <b>The first year</b>  |          |          |          |          |            |          |
| Lean mass              | 0.3068   | <.0001   | 0.4105   | <.0001   | 0.4720     | <.0001   |
| Fat mass               | 0.2524   | 0.0003   | 0.3003   | <.0001   | 0.3578     | <.0001   |
| <b>The second year</b> |          |          |          |          |            |          |
| Lean mass              | 0.3522   | <.0001   | 0.4239   | <.0001   | 0.4648     | <.0001   |
| Fat mass               | 0.1712   | 0.0156   | 0.2025   | 0.0040   | 0.2832     | <.0001   |

doi:10.1371/journal.pone.0137097.t002

### Linear Mixed Model of the Primary Variables on the BMD: 2-Year Follow-Up Data

Table 4 shows the coefficients of linear mixed model when only lean mass and fat mass were entered into the model as the predictors of BMD. Lean mass was a significant predictor of BMD of the spine, hip, and the total body ( $P < 0.0001$ ). Fat mass was a significant determinant of BMD in the total body ( $P < 0.0001$ ) but not in the spine ( $P = 0.075$ ) and hip ( $P = 0.124$ ).

Table 5 shows the coefficients of linear mixed model of multiple factors on the BMD at all sites. Lean mass, years since menopause and age of menophania were significant determinants of BMD at all sites over the 2-year study period. Years since menopause was a significant risk factor of BMD of the spine ( $P < 0.0001$ ), hip ( $P = 0.0002$ ) and the total body ( $P < 0.0001$ ). Weight was positively correlated with BMD of the spine and total body ( $P = 0.042$  and  $P < 0.0001$ , respectively) and was borderline significance in hip ( $P = 0.069$ ). Dietary pattern 2 was a significant influencing factor of BMD of the spine ( $P = 0.001$ ) and hip ( $P = 0.037$ ).

**Table 3. Partial correlation of BMD of the spine, hip, and the total body with body composition at baseline and follow-up (adjusting for height and calcium supplementation).**

| Parameters             | BMD      |          |          |          |            |          |
|------------------------|----------|----------|----------|----------|------------|----------|
|                        | Spine    |          | Hip      |          | Total body |          |
|                        | <i>r</i> | <i>P</i> | <i>r</i> | <i>P</i> | <i>r</i>   | <i>P</i> |
| <b>The baseline</b>    |          |          |          |          |            |          |
| Lean mass              | 0.2500   | <.0001   | 0.3226   | <.0001   | 0.3129     | <.0001   |
| Fat mass               | 0.0750   | 0.2103   | 0.1604   | 0.0071   | 0.1617     | 0.0066   |
| <b>The first year</b>  |          |          |          |          |            |          |
| Lean mass              | 0.1825   | 0.0092   | 0.3170   | <.0001   | 0.3519     | <.0001   |
| Fat mass               | 0.1834   | 0.0088   | 0.2305   | 0.0009   | 0.2821     | <.0001   |
| <b>The second year</b> |          |          |          |          |            |          |
| Lean mass              | 0.2496   | 0.0004   | 0.2938   | <.0001   | 0.3332     | <.0001   |
| Fat mass               | 0.1119   | 0.1164   | 0.1273   | 0.0732   | 0.2093     | 0.0030   |

doi:10.1371/journal.pone.0137097.t003



**Table 4. The results from linear mixed model of lean mass and fat mass on BMD of the spine, hip, and the total body: 2-year follow-up data.**

| Body composition | BMD     |          |         |          |            |          |
|------------------|---------|----------|---------|----------|------------|----------|
|                  | Spine   |          | Hip     |          | Total body |          |
|                  | $\beta$ | <i>P</i> | $\beta$ | <i>P</i> | $\beta$    | <i>P</i> |
| Lean mass        | 0.0105  | <.0001   | 0.0069  | <.0001   | 0.0038     | <.0001   |
| Fat mass         | 0.0022  | 0.0753   | 0.0014  | 0.1240   | 0.0032     | <.0001   |

doi:10.1371/journal.pone.0137097.t004

Dietary pattern 3 was a significant predictor of BMD of hip ( $P = 0.010$ ). However, neither dietary pattern 2 nor dietary pattern 3 was a significant determinant of BMD of the total body. On the other hand, family income and physical activity level had significant relationships with BMD of hip ( $P = 0.003$  and  $P = 0.042$ , respectively). The significant associations of SBP with BMD of the spine and fat mass and height with BMD of the total body were also found. WHR was negatively related to BMD of the spine and hip ( $P = 0.008$  and  $P = 0.011$ , respectively). In contrast, no significant relationship was observed between BMD of all sites and the following baseline characteristics: age, change of weight since menopause, educational attainment, and occupation.

### Discussion

Although many studies have been reported correlations between body composition and BMD, the relative contribution of lean mass and fat mass to BMD in postmenopausal women is a contentious issue. In this prospective study, the relative contribution of body composition

**Table 5. The results from linear mixed model of the primary variables on BMD of the spine, hip, and the total body: 2-year follow-up data.**

| Factors                          | BMD     |          |         |          |            |          |
|----------------------------------|---------|----------|---------|----------|------------|----------|
|                                  | Spine   |          | Hip     |          | Total body |          |
|                                  | $\beta$ | <i>P</i> | $\beta$ | <i>P</i> | $\beta$    | <i>P</i> |
| Lean mass                        | 0.0056  | 0.0228   | 0.0045  | 0.0188   | 0.0007     | <.0001   |
| Fat mass                         | -0.0017 | 0.4570   | -0.0013 | 0.4557   | 0.0013     | <.0001   |
| Age                              | -0.0008 | 0.7068   | -0.0006 | 0.7028   | 0.0021     | 0.2145   |
| Years since menopause            | -0.0087 | <.0001   | -0.0054 | 0.0002   | -0.0060    | <.0001   |
| Dietary pattern 2                | -0.0189 | 0.0006   | -0.0087 | 0.0368   | -0.0075    | 0.0783   |
| Dietary pattern 3                | 0.0054  | 0.3261   | 0.0108  | 0.0104   | 0.0005     | 0.9017   |
| Height                           | 0.0007  | 0.5948   | -0.0007 | 0.5247   | 0.0021     | 0.0414   |
| Weight                           | 0.0046  | 0.0420   | 0.0031  | 0.0689   | 0.0037     | <.0001   |
| SBP*                             | 0.0007  | 0.0266   | -0.0001 | 0.5585   | -0.0002    | 0.3943   |
| WHR#                             | -0.3577 | 0.0075   | -0.2593 | 0.0110   | -0.1146    | 0.2613   |
| Change of weight since menopause | -0.0010 | 0.3348   | 0.0006  | 0.4358   | -0.0008    | 0.3436   |
| Age of menophania                | -0.0093 | 0.0011   | -0.0057 | 0.0090   | -0.0055    | 0.0148   |
| Educational attainment           | 0.0135  | 0.0747   | -0.0004 | 0.9523   | -0.0083    | 0.1659   |
| Occupation                       | -0.0011 | 0.8599   | -0.0015 | 0.7606   | -0.0019    | 0.7094   |
| Family income                    | 0.0069  | 0.1069   | 0.0098  | 0.0029   | 0.0063     | 0.0574   |
| Physical activity level          | 0.0078  | 0.1390   | -0.0083 | 0.0419   | 0.0065     | 0.1123   |

\*systolic blood pressure

#waist-hip-ratio

doi:10.1371/journal.pone.0137097.t005



measurements and other factors to BMD was examined. To our knowledge, this is the first longitudinal study to investigate the relative contribution of lean mass, fat mass, and dietary patterns to BMD in the postmenopausal Chinese women, whose body composition and lifestyle are possibly different from western populations[30]. Previous cross-sectional studies showed that both lean mass and fat mass were positively correlated with BMD of the spine, hip, and the total body. When adjusting for height, partial correlation coefficients showed that the association of fat mass with BMD at the spine at baseline and at the spine and hip in the second year was eliminated. The VIP of lean mass to BMD are prior to the VIP of fat mass in the PLS analysis. Therefore, lean mass was a better determinant of BMD than fat mass. The results from the multiple factors linear mixed model demonstrated that lean mass, not fat mass, was the significant predictor of BMD. Although some previous studies reported the same conclusions[11, 18, 20, 25, 31, 32], only the correlation between BMD and body composition adjusting for body size was analyzed in those studies. The effects of other factors such as years since menopause, dietary patterns, past physical activity level, and demographic and socioeconomic background on BMD were not considered simultaneously. The relative contribution of these factors to BMD was unknown. The present paper used PLS to obtain VIP of all variables to BMD. Then the top sixteen factors entered into the linear mixed model of the BMD follow-up data. Therefore, this paper provided a more comprehensive and convincing evidence on relative contribution of body composition and other factors to the determination of BMD.

In this study, dietary pattern of the participants, in addition to dietary calcium intake, was considered. Factor analysis identified six dietary patterns and 64.61% variance was explained. Since the FFQ was filled using the diet data of participants of the past year, recall bias was inevitable. The imperfect data might lead to the poor dietary pattern and lesser variance to be explained. Therefore, only dietary pattern 2 and dietary pattern 3 were entered into the top sixteen of all variables in the PLS analysis. Dietary pattern 2 was characterized by a frequent intake of rice, cooked wheaten food, fried food, and other grains and little intake of fruits. It was negatively correlated with BMD of the spine and hip. Dietary pattern 3 was dominated by a frequent intake of milk and little intake of root vegetables and was positively correlated with BMD of hip. This demonstrated that milk supplementation might have beneficial effect on BMD, which has been demonstrated by many randomized controlled trials[33–35].

From the results of linear mixed model, years since menopause was negatively associated with BMD of all sites since estrogen will obviously decrease after menopause, and estrogen is known to inhibit bone resorption by inducing osteoclasts apoptosis[36]. Menopause is accompanied by dramatic body composition changes, including an increase in total body and central adiposity, decrease in gynoid fat proportion, and a significant decrease in total and regional BMD[37, 38]. Therefore, postmenopausal women with more years since menopause were more likely to experience rapid bone loss and develop osteoporosis.

WHR, as a marker for visceral fat, was negatively associated with BMD of the spine and hip in the multiple factors linear mixed model. Therefore, fat distribution might have different effects on BMD of different sites. This finding confirmed the conclusion by Zillikens MC[39].

In the literature, BMI is often used as body size as a potential confounder when assessing the association between a factor and BMD. However, because of lack of empirical evidence and difficulty in interpretation, this usage is sub-optimal. Empirically, weight and height are better agency of body size than BMI[20]. In this study, height, rather than weight, was chosen as an agency of body size, because the correlation between fat mass and height ( $r = 0.236$ ) was lower than the correlation between fat mass and weight ( $r = 0.828$ ).

Although a few longitudinal studies investigating the influencing factors of BMD have been reported, most of them only focused on the correlation between the changes of lean mass and fat mass and the changes of BMD over time. Since these studies did not make full use of the

original data of longitudinal study, the dynamic relationship between body composition and BMD could not be completely assessed. In addition, these studies only investigated the association between body composition and BMD, without adjusting for the effect of other factors, such as general conditions, physiologic factors and lifestyle factors. The strength of this paper was apparent. PLS was used to variables selection for all variables and top sixteen factors entered into the linear mixed model for the follow-up data. BMD of three time measurements were taken as the dependent variables, lean mass and fat mass as the time specific independent variables and the rest as the covariates. Therefore, the findings of this study would improve our understanding of the dynamic contributions of lean mass, fat mass, and other factors to BMD in a longitudinal study.

Limitations to the present study should be noted. Firstly, the study subjects were selected from one clinic, and they were unlikely to represent the general population. Secondly, the subjects were all Chinese. The results might not be generalized to other ethnicities. Thirdly, this study was based on a randomized controlled trial. Although the calcium supplementation was adjusted for in all analyses, it is possible that the influence was not completely eliminated.

In conclusion, this longitudinal study suggests that lean mass, not fat mass, age of menopause, and years since menopause are the determinants of BMD of the spine, hip, and the total body. More importantly, lean mass is the best predictor of BMD. The dietary pattern (cereal grains-fruits pattern) will accelerate bone loss in the spine and hip, and the dietary pattern (milk-root vegetables pattern) will improve the BMD of hip.

## Acknowledgments

We thank the staff of Hongqi Community Health Center for their help in selecting data of follow-up period.

## Author Contributions

Conceived and designed the experiments: ML QZ. Performed the experiments: XC HL. Analyzed the data: ZW YX. Contributed reagents/materials/analysis tools: JX DZ. Wrote the paper: YC ZW.

## References

1. Fu X, Ma X, Lu H, He W, Wang Z, Zhu S. Associations of fat mass and fat distribution with bone mineral density in pre- and postmenopausal Chinese women. *Osteoporosis international: a journal established as result of cooperation between the European Foundation for Osteoporosis and the National Osteoporosis Foundation of the USA*. 2011; 22(1):113–9. doi: [10.1007/s00198-010-1210-9](https://doi.org/10.1007/s00198-010-1210-9) PMID: [20306018](https://pubmed.ncbi.nlm.nih.gov/20306018/).
2. Blain H, Carriere I, Favier F, Jeandel C, Papoz L, Group ES. Body weight change since menopause and percentage body fat mass are predictors of subsequent bone mineral density change of the proximal femur in women aged 75 years and older: results of a 5 year prospective study. *Calcified tissue international*. 2004; 75(1):32–9. doi: [10.1007/s00223-003-0192-4](https://doi.org/10.1007/s00223-003-0192-4) PMID: [15129366](https://pubmed.ncbi.nlm.nih.gov/15129366/).
3. Sambrook P, Cooper C. Osteoporosis. *Lancet*. 2006; 367(9527):2010–8. doi: [10.1016/S0140-6736\(06\)68891-0](https://doi.org/10.1016/S0140-6736(06)68891-0) PMID: [16782492](https://pubmed.ncbi.nlm.nih.gov/16782492/).
4. Cummings SR, Melton LJ. Epidemiology and outcomes of osteoporotic fractures. *Lancet*. 2002; 359(9319):1761–7. doi: [10.1016/S0140-6736\(02\)08657-9](https://doi.org/10.1016/S0140-6736(02)08657-9) PMID: [12049882](https://pubmed.ncbi.nlm.nih.gov/12049882/).
5. Yaegashi Y, Onoda T, Tanno K, Kuribayashi T, Sakata K, Orimo H. Association of hip fracture incidence and intake of calcium, magnesium, vitamin D, and vitamin K. *European journal of epidemiology*. 2008; 23(3):219–25. doi: [10.1007/s10654-008-9225-7](https://doi.org/10.1007/s10654-008-9225-7) PMID: [18214692](https://pubmed.ncbi.nlm.nih.gov/18214692/).
6. Yang S, Center JR, Eisman JA, Nguyen TV. Association between fat mass, lean mass, and bone loss: the Dubbo Osteoporosis Epidemiology Study. *Osteoporosis international: a journal established as result of cooperation between the European Foundation for Osteoporosis and the National Osteoporosis Foundation of the USA*. 2015; 26(4):1381–6. doi: [10.1007/s00198-014-3009-6](https://doi.org/10.1007/s00198-014-3009-6) PMID: [25572048](https://pubmed.ncbi.nlm.nih.gov/25572048/).
7. Nguyen ND, Center JR, Eisman JA, Nguyen TV. Bone loss, weight loss, and weight fluctuation predict mortality risk in elderly men and women. *Journal of bone and mineral research: the official journal of the*

- American Society for Bone and Mineral Research. 2007; 22(8):1147–54. doi: [10.1359/jbmr.070412](https://doi.org/10.1359/jbmr.070412) PMID: [17635040](https://pubmed.ncbi.nlm.nih.gov/17635040/).
8. Nih Consensus Development Panel on Osteoporosis Prevention D, Therapy. Osteoporosis prevention, diagnosis, and therapy. *JAMA: the journal of the American Medical Association*. 2001; 285(6):785–95. PMID: [11176917](https://pubmed.ncbi.nlm.nih.gov/11176917/).
  9. Bates DW, Black DM, Cummings SR. Clinical use of bone densitometry: clinical applications. *JAMA: the journal of the American Medical Association*. 2002; 288(15):1898–900. PMID: [12377089](https://pubmed.ncbi.nlm.nih.gov/12377089/).
  10. Dytfeld J, Ignaszak-Szczepaniak M, Gowin E, Michalak M, Horst-Sikorska W. Influence of lean and fat mass on bone mineral density (BMD) in postmenopausal women with osteoporosis. *Archives of gerontology and geriatrics*. 2011; 53(2):e237–42. doi: [10.1016/j.archger.2011.01.002](https://doi.org/10.1016/j.archger.2011.01.002) PMID: [21281972](https://pubmed.ncbi.nlm.nih.gov/21281972/).
  11. Namwongprom S, Rojanasthien S, Mangklabruks A, Soontrapa S, Wongboontan C, Ongphiphadhanakul B. Effect of fat mass and lean mass on bone mineral density in postmenopausal and perimenopausal Thai women. *International journal of women's health*. 2013; 5:87–92. doi: [10.2147/IJWH.S41884](https://doi.org/10.2147/IJWH.S41884) PMID: [23467695](https://pubmed.ncbi.nlm.nih.gov/23467695/); PubMed Central PMCID: PMC3589079.
  12. Da Shao H, Li GW, Liu Y, Qiu YY, Yao JH, Tang GY. Contributions of fat mass and fat distribution to hip bone strength in healthy postmenopausal Chinese women. *Journal of bone and mineral metabolism*. 2014:1–9.
  13. Zhu K, Hunter M, James A, Lim EM, Walsh JP. Associations between body mass index, lean and fat body mass and bone mineral density in middle-aged Australians: The Busselton Healthy Ageing Study. *Bone*. 2015; 74:146–52. doi: [10.1016/j.bone.2015.01.015](https://doi.org/10.1016/j.bone.2015.01.015) PMID: [25652209](https://pubmed.ncbi.nlm.nih.gov/25652209/).
  14. Woolf AD, Akesson K. Preventing fractures in elderly people. *Bmj*. 2003; 327(7406):89–95. doi: [10.1136/bmj.327.7406.89](https://doi.org/10.1136/bmj.327.7406.89) PMID: [12855529](https://pubmed.ncbi.nlm.nih.gov/12855529/); PubMed Central PMCID: PMC1126451.
  15. Piaseu N, Komindr S, Chailurkit LO, Ongphiphadhanakul B, Chansirikarn S, Rajatanavin R. Differences in bone mineral density and lifestyle factors of postmenopausal women living in Bangkok and other provinces. *Journal of the Medical Association of Thailand = Chotmaihet thangphaet*. 2001; 84(6):772–81. PMID: [11556454](https://pubmed.ncbi.nlm.nih.gov/11556454/).
  16. Ozdemir F, Demirbag D, Rodoplu M. Reproductive factors affecting the bone mineral density in postmenopausal women. *The Tohoku journal of experimental medicine*. 2005; 205(3):277–85. PMID: [15718820](https://pubmed.ncbi.nlm.nih.gov/15718820/).
  17. Ofluoglu D, Gunduz OH, Bekiroglu N, Kul-Panza E, Akyuz G. A method for determining the grade of osteoporosis based on risk factors in postmenopausal women. *Clinical rheumatology*. 2005; 24(6):606–11. doi: [10.1007/s10067-005-1110-0](https://doi.org/10.1007/s10067-005-1110-0) PMID: [16010446](https://pubmed.ncbi.nlm.nih.gov/16010446/).
  18. Liu-Ambrose T, Kravetsky L, Bailey D, Sherar L, Mundt C, Baxter-Jones A, et al. Change in lean body mass is a major determinant of change in areal bone mineral density of the proximal femur: a 12-year observational study. *Calcified tissue international*. 2006; 79(3):145–51. doi: [10.1007/s00223-006-0098-z](https://doi.org/10.1007/s00223-006-0098-z) PMID: [16969588](https://pubmed.ncbi.nlm.nih.gov/16969588/).
  19. Sotunde OF, Kruger HS, Wright HH, Havemann-Nel L, Kruger IM, Wentzel-Viljoen E, et al. Lean Mass Appears to Be More Strongly Associated with Bone Health than Fat Mass in Urban Black South African Women. *The journal of nutrition, health & aging*. 2015; 19(6):628–36. doi: [10.1007/s12603-015-0492-1](https://doi.org/10.1007/s12603-015-0492-1) PMID: [26054499](https://pubmed.ncbi.nlm.nih.gov/26054499/).
  20. Ho-Pham LT, Nguyen ND, Lai TQ, Nguyen TV. Contributions of lean mass and fat mass to bone mineral density: a study in postmenopausal women. *BMC musculoskeletal disorders*. 2010; 11:59. doi: [10.1186/1471-2474-11-59](https://doi.org/10.1186/1471-2474-11-59) PMID: [20346165](https://pubmed.ncbi.nlm.nih.gov/20346165/); PubMed Central PMCID: PMC2867833.
  21. Chen Z, Lohman TG, Stini WA, Ritenbaugh C, Aickin M. Fat or lean tissue mass: which one is the major determinant of bone mineral mass in healthy postmenopausal women? *Journal of bone and mineral research: the official journal of the American Society for Bone and Mineral Research*. 1997; 12(1):144–51. doi: [10.1359/jbmr.1997.12.1.144](https://doi.org/10.1359/jbmr.1997.12.1.144) PMID: [9240737](https://pubmed.ncbi.nlm.nih.gov/9240737/).
  22. Gnudi S, Sitta E, Fiumi N. Relationship between body composition and bone mineral density in women with and without osteoporosis: relative contribution of lean and fat mass. *Journal of bone and mineral metabolism*. 2007; 25(5):326–32. doi: [10.1007/s00774-007-0758-8](https://doi.org/10.1007/s00774-007-0758-8) PMID: [17704998](https://pubmed.ncbi.nlm.nih.gov/17704998/).
  23. Ho-Pham LT, Nguyen UD, Nguyen TV. Association between lean mass, fat mass, and bone mineral density: a meta-analysis. *The Journal of clinical endocrinology and metabolism*. 2014; 99(1):30–8. doi: [10.1210/jc.2013-3190](https://doi.org/10.1210/jc.2013-3190) PMID: [24384013](https://pubmed.ncbi.nlm.nih.gov/24384013/).
  24. Shao HD, Li GW, Liu Y, Qiu YY, Yao JH, Tang GY. Contributions of fat mass and fat distribution to hip bone strength in healthy postmenopausal Chinese women. *Journal of bone and mineral metabolism*. 2014. doi: [10.1007/s00774-014-0613-7](https://doi.org/10.1007/s00774-014-0613-7) PMID: [25269857](https://pubmed.ncbi.nlm.nih.gov/25269857/).
  25. Hsu YH, Venners SA, Terwedow HA, Feng Y, Niu T, Li Z, et al. Relation of body composition, fat mass, and serum lipids to osteoporotic fractures and bone mineral density in Chinese men and women. *The American journal of clinical nutrition*. 2006; 83(1):146–54. PMID: [16400063](https://pubmed.ncbi.nlm.nih.gov/16400063/).

26. Li S, Na L, Li Y, Gong L, Yuan F, Niu Y, et al. Long-term calcium supplementation may have adverse effects on serum cholesterol and carotid intima-media thickness in postmenopausal women: a double-blind, randomized, placebo-controlled trial. *The American journal of clinical nutrition*. 2013; 98(5):1353–9. doi: [10.3945/ajcn.113.062844](https://doi.org/10.3945/ajcn.113.062844) PMID: [24047919](https://pubmed.ncbi.nlm.nih.gov/24047919/).
27. Woo J, Leung S, Ho S, Lam T, Janus E. A food frequency questionnaire for use in the Chinese population in Hong Kong: description and examination of validity. *Nutrition research*. 1997; 17(11):1633–41.
28. Rännar S, Lindgren F, Geladi P, Wold S. A PLS kernel algorithm for data sets with many variables and fewer objects. Part 1: Theory and algorithm. *Journal of Chemometrics*. 1994; 8(2):111–25. doi: [10.1002/cem.1180080204](https://doi.org/10.1002/cem.1180080204)
29. Tobias RD, editor An introduction to partial least squares regression. Proc Ann SAS Users Group Int Conf, 20th, Orlando, FL; 1995.
30. Park YW, Allison DB, Heymsfield SB, Gallagher D. Larger amounts of visceral adipose tissue in Asian Americans. *Obesity research*. 2001; 9(7):381–7. doi: [10.1038/oby.2001.49](https://doi.org/10.1038/oby.2001.49) PMID: [11445659](https://pubmed.ncbi.nlm.nih.gov/11445659/).
31. Douchi T, Matsuo T, Uto H, Kuwahata T, Oki T, Nagata Y. Lean body mass and bone mineral density in physically exercising postmenopausal women. *Maturitas*. 2003; 45(3):185–90. PMID: [12818463](https://pubmed.ncbi.nlm.nih.gov/12818463/).
32. Taaffe DR, Cauley JA, Danielson M, Nevitt MC, Lang TF, Bauer DC, et al. Race and sex effects on the association between muscle strength, soft tissue, and bone mineral density in healthy elders: the Health, Aging, and Body Composition Study. *Journal of bone and mineral research: the official journal of the American Society for Bone and Mineral Research*. 2001; 16(7):1343–52. doi: [10.1359/jbmr.2001.16.7.1343](https://doi.org/10.1359/jbmr.2001.16.7.1343) PMID: [11450711](https://pubmed.ncbi.nlm.nih.gov/11450711/).
33. Lau E, Woo J, Lam V, Hong A. Milk supplementation of the diet of postmenopausal Chinese women on a low calcium intake retards bone loss. *Journal of Bone and Mineral Research*. 2001; 16(9):1704–9. PMID: [11547841](https://pubmed.ncbi.nlm.nih.gov/11547841/)
34. Chee W, Suriah A, Chan S, Zaitun Y, Chan Y. The effect of milk supplementation on bone mineral density in postmenopausal Chinese women in Malaysia. *Osteoporosis international*. 2003; 14(10):828–34. PMID: [12915959](https://pubmed.ncbi.nlm.nih.gov/12915959/)
35. Kruger M, Ha P, Todd J, Kuhn-Sherlock B, Schollum L, Ma J, et al. High-calcium, vitamin D fortified milk is effective in improving bone turnover markers and vitamin D status in healthy postmenopausal Chinese women. *European journal of clinical nutrition*. 2012; 66(7):856–61. doi: [10.1038/ejcn.2012.54](https://doi.org/10.1038/ejcn.2012.54) PMID: [22644348](https://pubmed.ncbi.nlm.nih.gov/22644348/)
36. Kameda T, Mano H, Yuasa T, Mori Y, Miyazawa K, Shiokawa M, et al. Estrogen inhibits bone resorption by directly inducing apoptosis of the bone-resorbing osteoclasts. *The Journal of experimental medicine*. 1997; 186(4):489–95. PMID: [9254647](https://pubmed.ncbi.nlm.nih.gov/9254647/); PubMed Central PMCID: PMC2199029.
37. Ley CJ, Lees B, Stevenson JC. Sex- and menopause-associated changes in body-fat distribution. *The American journal of clinical nutrition*. 1992; 55(5):950–4. PMID: [1570802](https://pubmed.ncbi.nlm.nih.gov/1570802/).
38. Gambacciani M, Spinetti A, de Simone L, Cappagli B, Maffei S, Taponeco F, et al. The relative contributions of menopause and aging to postmenopausal vertebral osteopenia. *The Journal of clinical endocrinology and metabolism*. 1993; 77(5):1148–51. doi: [10.1210/jcem.77.5.8077305](https://doi.org/10.1210/jcem.77.5.8077305) PMID: [8077305](https://pubmed.ncbi.nlm.nih.gov/8077305/).
39. Zillikens MC, Uitterlinden AG, van Leeuwen JP, Berends AL, Henneman P, van Dijk KW, et al. The role of body mass index, insulin, and adiponectin in the relation between fat distribution and bone mineral density. *Calcified tissue international*. 2010; 86(2):116–25. doi: [10.1007/s00223-009-9319-6](https://doi.org/10.1007/s00223-009-9319-6) PMID: [19957167](https://pubmed.ncbi.nlm.nih.gov/19957167/); PubMed Central PMCID: PMC2809303.
